# Supplementary material for: Attention based simplified deep residual network for citywide crowd flows prediction
Source: Springer Nature journal article supplement (doi:10.1007/s11704-020-9194-x), 2021-01-04
Supplement: 11704_2020_9194_MOESM1_ESM.pdf [file 11704_2020_9194_MOESM1_ESM.pdf]

Attention based simplified deep  
residual network for citywide crowd  
flows prediction

**Genan DAI, Xiaoyang HU, Youming GE, Zhiqing NING,  
Yubao LIU**

Frontiers of Computer Science, DOI: [10.1007/s11704-020-9194-x](https://doi.org/10.1007/s11704-020-9194-x)

# Problems & Method

- **Problem:** The goal of the problem is to predict the number of incoming and outgoing people of regions in a city.
- **Method:**
  - We propose a simplified deep residual network by removing redundant branches and simplifying three-way branches into one network structure.
  - We adopt the spatio-temporal attention mechanism to further improve prediction performance.

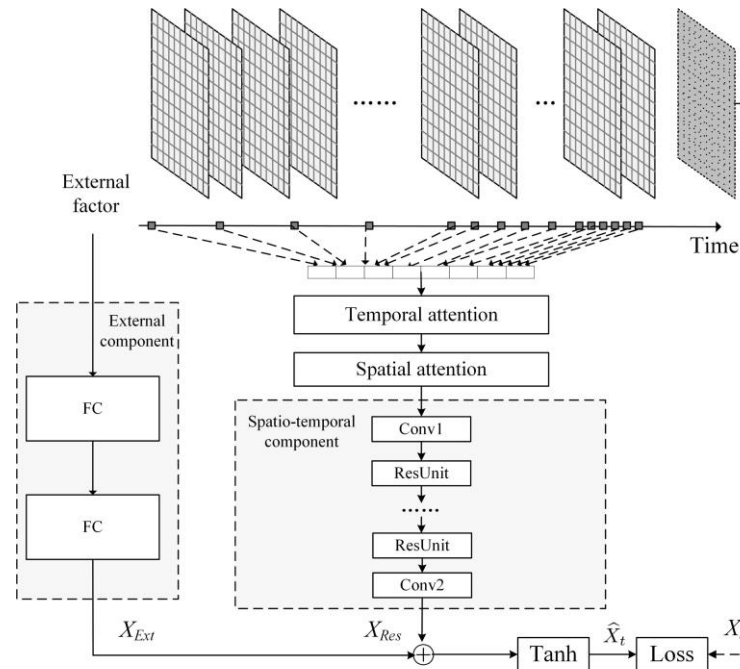

Fig.1. The architecture of our method

# Main Experiment Results

Our methods can obtain not only less training time but also competitive prediction performance compared with baselines, as shown in Table 1,2.

Table 1 Comparison among different methods

| Methods           | RMSE         |             |
|-------------------|--------------|-------------|
|                   | TaxiBJ       | BikeNYC     |
| ARIMA             | 22.78        | 10.07       |
| SARIMA            | 26.88        | 10.56       |
| VAR               | 22.88        | 9.92        |
| DeepST            | 18.18        | 7.43        |
| ST-ResNet         | 16.69        | 6.33        |
| Simplified method | 16.32        | 6.33        |
| Enhanced method   | <b>16.04</b> | <b>5.96</b> |

Table 2 Time consumptions of training time

| Methods           | Time consumptions(s) |         |
|-------------------|----------------------|---------|
|                   | TaxiBJ               | BikeNYC |
| ST-ResNet         | 5925.038             | 476.894 |
| Simplified method | 2214.128             | 196.407 |
| Enhanced method   | 2395.781             | 260.891 |
